# Supplementary material for: Effect of ligand groups on photoexcited charge carrier dynamics at the perovskite/TiO2 interface
Source: Royal Society of Chemistry journal article supplement (doi:10.1039/d1ra05306j), 2021-12-21
Supplement: d1ra05306j2.pdf [file d1ra05306j2.pdf]

SUPPORTING INFORMATION

# Effect of Ligand Groups on Photoexcited Charge Carrier Dynamics at Perovskite/TiO<sub>2</sub> Interface

Landon Johnson<sup>1</sup>, Dmitri Kilin<sup>2</sup>

<sup>1</sup>Department of Physics, North Dakota State University, Fargo, ND 58108

<sup>2</sup>Department of Chemistry and Biochemistry, Fargo, ND 58108

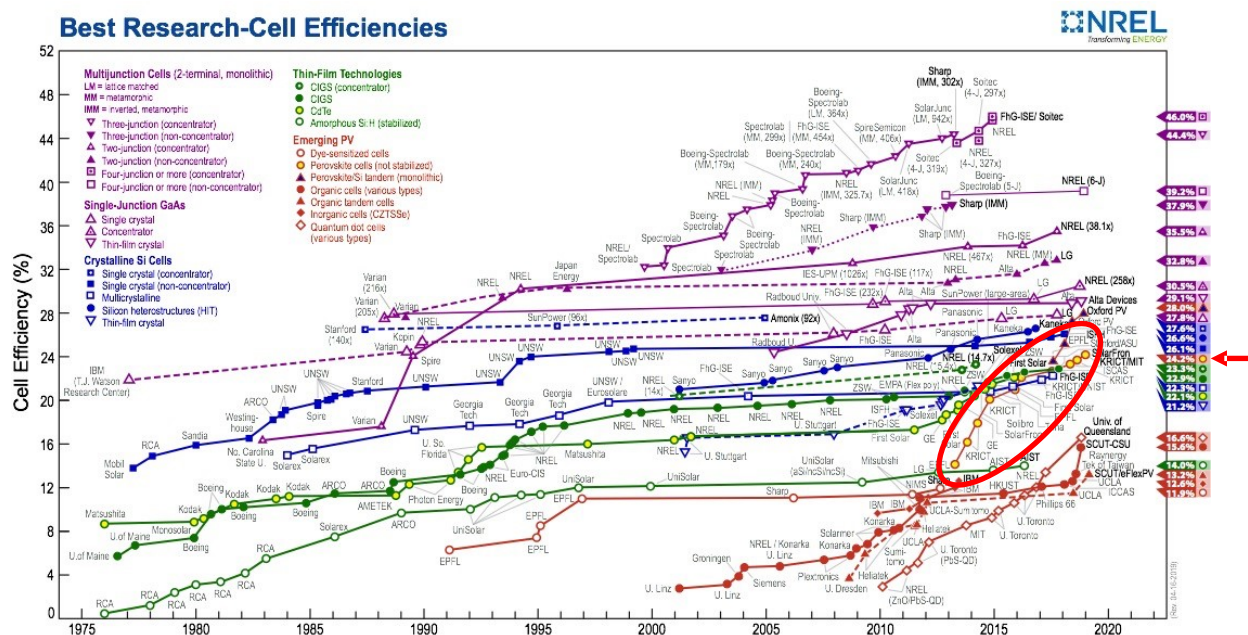

**Figure S1.** Plot of highest verified solar cell efficiencies vs time. Perovskite solar cells are circled and the current maximum perovskite solar cell efficiency is pointed out on the right. The plot was taken from <https://www.nrel.gov/pv/cell-efficiency.html>

The Fock matrix is defined as:

$$F = \sum_i^{n_e/2} \left( h_i + \sum_{j=1}^{n_e/2} [2J_{ij} - K_{ij}] \right) \quad (S1)$$

Where  $h_i$  is the one-electron Hamiltonian for the  $i^{th}$  orbital,

$$J_j(\vec{r}) = \int d\vec{r}' \frac{|\varphi_j(\vec{r}')|^2}{|\vec{r} - \vec{r}'|} \quad (\text{S2})$$

Is the Coulomb operator, and

$$K_j(\vec{r})\varphi_i(\vec{r}) = \varphi_j(\vec{r}) \int d\vec{r}' \frac{\varphi_j^*(\vec{r}')\varphi_i(\vec{r}')}{|\vec{r} - \vec{r}'|} \quad (\text{S3})$$

Is the action of the exchange operator on an orbital  $\varphi_i(\vec{r})$ .
